# Supplementary material for: Silicon Nanowire Phototransistor Arrays for CMOS Image Sensor Applications
Source: MDPI journal article supplement (doi:10.3390/s23249824), 2023-12-14
Supplement: s1 [file s1]

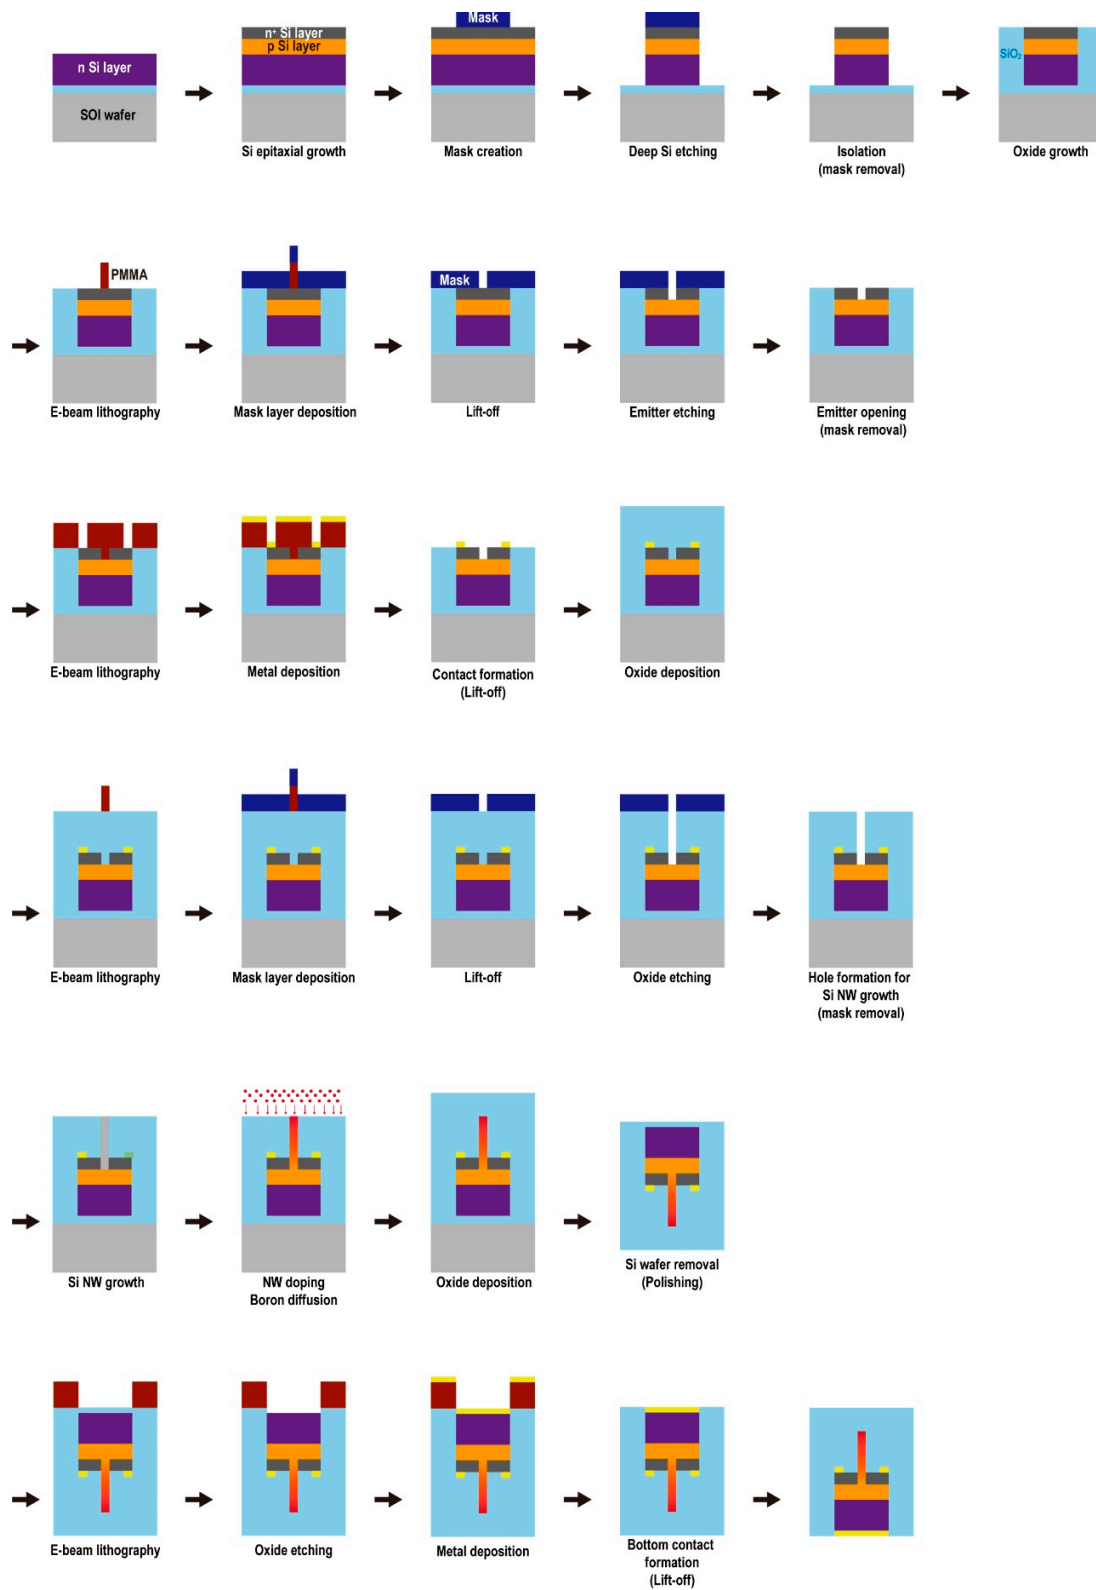

Figure S1. Sequential steps of device fabrication utilizing traditional Si processing techniques.
